# Supplementary material
Source: HighWire-hosted journal article supplement (http://rc.rcjournal.com/highwire/filestream/21975/field_highwire_adjunct_files/0/rc-09250-File001.docx)
Supplement: rc-09250-File001.docx [file rc-09250-File001.docx]

Supplemental Table 1: Use of Cuffed ETT by Diagnosis

| **Diagnosis** | **Pre-intervention** | **Post-intervention** | **p-value** |
| --- | --- | --- | --- |
| Respiratory  Septic shock  Cardiac arrest  Seizure  Trauma  Drowning  Toxin/poison  Other | 4/17 (23.5%)  1/2 (50%)  2/4 (50%)  6/12 (50%)  1/3 (33.3%)  1/1 (100%)  2/5 (40%)  4/4 (100%) | 10/19 (52.6%)  0/1 (0.0%)  4/7 (57.1%)  31/38 (81.6%)  7/10 (70%)  0 (0%)  7/7 (100%)  4/5 (80%) | 0.10  1.00  1.00  0.06  0.51  N/A  0.05  1.00 |
